# Supplementary figures and images for: Innovation and robustness in complex regulatory gene networks
Source: HighWire-hosted journal article supplement (doi:10.1073/pnas.0705396104), 2007-08-10

*number of networks*

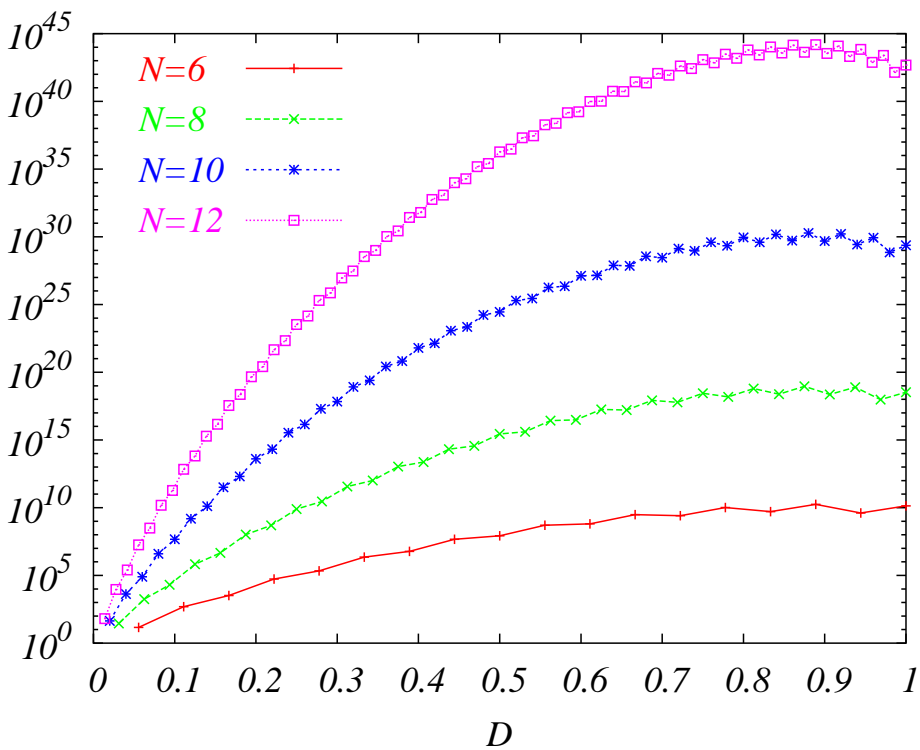

Supplement: 05396Fig9.pdf [file 05396Fig9.pdf]
